# Supplementary material for: CircCRIM1 promotes ovarian cancer progression by working as ceRNAs of CRIM1 and targeting miR-383-5p/ZEB2 axis
Source: PubMed Central journal article supplement (PMC8630901; doi:10.1186/s12958-021-00857-3), 2021-11-30
Supplement: 12958_2021_857_MOESM1_ESM.pdf [file 12958_2021_857_MOESM1_ESM.pdf]

**Supplemental Table 1:** circCRIM1 expression in normal ovarian and ovarian cancer tissues

| <b>Groups</b>          | <b>N</b> | <b>circCRIM1 expression /<br/><math>\beta</math>-actin</b> | <b><i>P</i> value</b> |
|------------------------|----------|------------------------------------------------------------|-----------------------|
| Normal ovarian tissues | 24       | 0.128±0.050                                                | <b><i>0.001</i></b>   |
| ovarian cancer tissues | 130      | 0.914±0.223                                                |                       |

Bold and Italics means  $P < 0.05$ .

**Supplemental Table 2:** CRIM1 expression in normal ovarian and ovarian cancer tissues

| <b>Groups</b>          | <b>N</b> | <b>CRIM1 expression / <math>\beta</math>-actin</b> | <b><i>P</i> value</b> |
|------------------------|----------|----------------------------------------------------|-----------------------|
| Normal ovarian tissues | 24       | 0.238 $\pm$ 0.063                                  | <b><i>0.015</i></b>   |
| Ovarian cancer tissues | 130      | 0.992 $\pm$ 0.299                                  |                       |

Bold and Italics means  $P < 0.05$ .

**Supplemental Table 3:** Correlation of circCRIM1 expression with different clinicopathological features of ovarian cancer

| Clinicopathological features    | N   | circCRIM1 expression /<br>$\beta$ -actin | <i>P</i> value |
|---------------------------------|-----|------------------------------------------|----------------|
| <b>The pathology types</b>      |     |                                          | 0.254          |
| Serous carcinoma                | 101 | 0.780±0.256                              |                |
| The other pathology types       | 29  | 1.382 ±0.454                             |                |
| <b>Age</b>                      |     |                                          | 1.000          |
| ≤ 52                            | 67  | 0.914 ±0.316                             |                |
| > 52                            | 63  | 0.915 ±0.319                             |                |
| <b>FIGO stages</b>              |     |                                          | 0.067          |
| I-II                            | 44  | 0.471 ±0.172                             |                |
| III-IV                          | 85  | 1.155 ±0.328                             |                |
| <b>Pathology classification</b> |     |                                          | 0.464          |
| Well+Mod                        | 28  | 0.636±0.238                              |                |
| Poor                            | 99  | 0.898±0.266                              |                |

Bold and Italics means  $P < 0.05$ , one ovarian cancer patient lacks information on stage, and three lack information on differentiation.

**Supplemental Table 4:** Correlation of CRIM1 expression with different clinicopathological features of ovarian cancer

| Clinicopathological features    | N   | CRIM1 expression / $\beta$ -actin | <i>P</i> value |
|---------------------------------|-----|-----------------------------------|----------------|
| <b>The pathology types</b>      |     |                                   | 0.338          |
| Serous carcinoma                | 101 | 0.839 $\pm$ 0.342                 |                |
| The other pathology types       | 29  | 1.526 $\pm$ 0.621                 |                |
| <b>Age</b>                      |     |                                   | 0.914          |
| $\leq$ 52                       | 67  | 1.023 $\pm$ 0.461                 |                |
| $>$ 52                          | 63  | 0.959 $\pm$ 0.380                 |                |
| <b>FIGO stages</b>              |     |                                   | 0.110          |
| I-II                            | 44  | 0.475 $\pm$ 0.202                 |                |
| III-IV                          | 85  | 1.261 $\pm$ 0.444                 |                |
| <b>Pathology classification</b> |     |                                   | 0.073          |
| Well+Mod                        | 28  | 0.348 $\pm$ 0.102                 |                |
| Poor                            | 99  | 1.023 $\pm$ 0.359                 |                |

Bold and Italics means  $P < 0.05$ , one ovarian cancer patient lacks information on stage, and three lack information on differentiation.

**Supplemental Table 5:** circCRIM1 expression plasmid construction (The bold area are circCRIM1 sequences)

GGGAATGGAGCTATATAGCAGAGCTCGTTTAGTGACCGTCAGATCGCCTGGAGACGCCATC  
CACGCTGTTTTGACCTCCATAGAAGACACCGACTCTACTAGAGGATCTATTTCCGGTGAATT  
CAAAGTGCTGAGATTACAGGCGTGAGCCACCACCCCGGCCACTTTTTGTAAAGGTACGT  
ACTAATGACTTTTTTTTTTATACTTCAGATGAGAACTGGACTGATGACCAACTGCTTGGTT  
**TTAAACCATGCAATGAAAACCTTATTGCTGGCTGCAATATAATCAATGGGAAATGTGAA**  
**TGTAACACCATTGAACTGCAGCAATCCCTTTGAGTTTCCAAGTCAGGATATGTGCC**  
**TTTCAGCTTTAAAGAGAATTGAAGAAGAGAAGCCAGATTGCTCCAAGGCCCGCTGTG**  
**AAGTCCAGTTCTCTCCACGTTGTCCTGAAGATTCTGTTCTGATCGAGGGTTATGCTCC**  
**TCCTGGGGAGTGCTGTCCCTTACCCAGCCGCTGCGTGTGCAACCCCGCAGGCTGTCT**  
**GCGCAAAGTCTGCCAGCCGGGAAACCTGAACATACTAGTGTCAAAAGCCTCAGGGAA**  
**GCCGGGAGAGTGCTGTGACCTCTATGAGTGC AAACCAGTTTTTCGGCGTGGACTGCAG**  
**GACTGTGGAATGCCCTCCTGTT CAGCAGACCGCGTGTCCCCGGACAGCTATGAAAC**  
**TCAAGTCAGACTAACTGCAGATGGTTGCTGTACTTTGCCAACAAGGTAAGAAGCAAGG**  
AAAAGAATTAGGCTCGGCACGGTAGCTCACACCTGTAATCCCAGCAGGATCCATCGATACT  
AGTAAGGATCTGCGATCGCTCCGGTGCCCGTCAGTGGGCAGAGCGCACATCGCCACAGTC  
CCCGAGAAGTTGGGGGGAGGGGTCGGCAATTGAACGGGTGCCTAGAGAAGGTGGCGCGG  
GGTAAACTGGGAAAGTGATGTCGTGTACTGGCTCCGCCTTTTTCCCGAGGGGTGGGG

**Supplemental Table 6:** The sequences of shRNA targeting circCRIM1 (The bold area are the target sequences)

sh1-circCRIM1

Top strand:

**GATCCGTGCCAACAAGATGAGA****ACTGGACTTCAAGAGAGTCCAGTTCTCATCTTGTTG**  
**GCATTTTTTC**

Bottom strand:

**AATTGAAAAAATGCCAACAAGATGAGA****ACTGGACTCTCTTGAAGTCCAGTTCTCATCT**  
**TGTTGGCACG**

sh2-circCRIM1

Top strand:

**GATCCGACTTTGCCAACAAGATGAGA****ACTGTTCAAGAGACAGTTCTCATCTTGTTGGC**  
**AAAGTTTTTTTC**

Bottom strand:

**AATTGAAAAAACTTTGCCAACAAGATGAGA****ACTGTCTCTTGAACAGTTCTCATCTTG**  
**TTGGCAAAGTCG**

**Supplemental Table 7:** circCRIM1-FLAG expression plasmid construction (The bold area are 3×flag sequences)

AAAGTGCTGAGATTACAGGCGTGAGCCACCACCCCGGCCACTTTTTGTAAAGGTACGT  
ACTAATGACTTTTTTTTTATACTTCAGATGAGGACTACAAGGATGACGATGACAAGGAT  
**TACAAAGACGACGATGATAAGGACTATAAGGATGATGACGACAAAACTGGACTGAT**  
GACCAACTGCTTGGTTTTAAACCATGCAATGAAAACCTTATTGCTGGCTGCAATATAATCA  
ATGGGAAATGTGAATGTAACACCATTTCGAACCTGCAGCAATCCCTTTGAGTTTCCAAGTCA  
GGATATGTGCCTTTCAGCTTTAAAGAGAATTGAAGAAGAGAAGCCAGATTGCTCCAAGGC  
CCGCTGTGAAGTCCAGTTCTCTCCACGTTGTCCTGAAGATTCTGTTCTGATCGAGGGTTAT  
GCTCCTCCTGGGGAGTGCTGTCCCTTACCCAGCCGCTGCGTGTGCAACCCCGCAGGCTGTC  
TGCGCAAAGTCTGCCAGCCGGGAAACCTGAACATACTAGTGTCAAAAGCCTCAGGGAAGC  
CGGGAGAGTGCTGTGACCTCTATGAGTGCAAACCAGTTTTTCGGCGTGGACTGCAGGACTG  
TGAATGCCCTCCTGTTTCAGCAGACCGCGTGTCCCCGGACAGCTATGAAACTCAAGTCA  
GACTAACTGCAGATGGTTGCTGTACTTTGCCAACAAGGTAAGAAGCAAGGAAAAGAATTA  
GGCTCGGCACGGTAGCTCACACCTGTAATCCCAGCA

**Supplemental Table 8:** The introduced sequences of 188aa-flag plasmid (The bold area are 3×flag sequences)

ATGGTTGCTGTACTTTGCCAACAAGATGAGAACTGGACTGATGACCAACTGCTTGGTTTTAAACCATGCAAT  
GAAAACCTTATTGCTGGCTGCAATATAATCAATGGGAAATGTGAATGTAACACCATTGAACTGCAGCAATC  
CCTTTGAGTTTCCAAGTCAGGATATGTGCCTTTCAGCTTTAAAGAGAATTGAAGAAGAGAAGCCAGATTGCT  
CCAAGGCCCGCTGTGAAGTCCAGTTCTCTCCACGTTGCTCCTGAAGATTCTGTTCTGATCGAGGGTTATGCTCC  
TCCTGGGGAGTGCTGTCCCTTACCCAGCCGCTGCGTGTGCAACCCCGCAGGCTGTCTGCGCAAAGTCTGCC  
AGCCGGGAAACCTGAACATACTAGTGTCAAAAGCCTCAGGGAAGCCGGGAGAGTGCTGTGACCTCTATGA  
GTGCAAACCAAGTTTTTCGGCGTGGACTGCAGGACTGTGGAATGCCCTCCTGTTGAGCAGACCCGCGTGTCCCC  
CGGACAGCTATGAACTCAAGTCAGACTAACTGCAGATGGTTGCTGTACTTTGCCAACAAGAGACTACA  
**AGGATGACGATGACAAGGATTACAAAGACGACGATGATAAGGACTATAAGGATGAT**  
**GACGACAAATGA**



**Supplemental Table 9:** The detail of primer sequences

| <b>Names</b>       | <b>Sequences</b>            |
|--------------------|-----------------------------|
| circ primer        | L 5'-agtctgtgacctctatga-3'  |
|                    | R 5'-ctggctctctcttcaattc-3' |
| convergent primer1 | L 5'-acatctgtcgctgtaagaa-3' |
|                    | R 5'-cattcccgtccattgaga-3'  |
| convergent primer2 | L 5'-gtgctgccttaccca-3'     |
|                    | R 5'-cagccacgccgaaa-3'      |
| mRNA primer        | L 5'-ctctggcttatgtggttcc-3' |
|                    | R 5'-cgcaggctggctttgt-3'    |

**Supplemental Figure 1:** CircCRIM1 is derived from CRIM1 by back-splicing

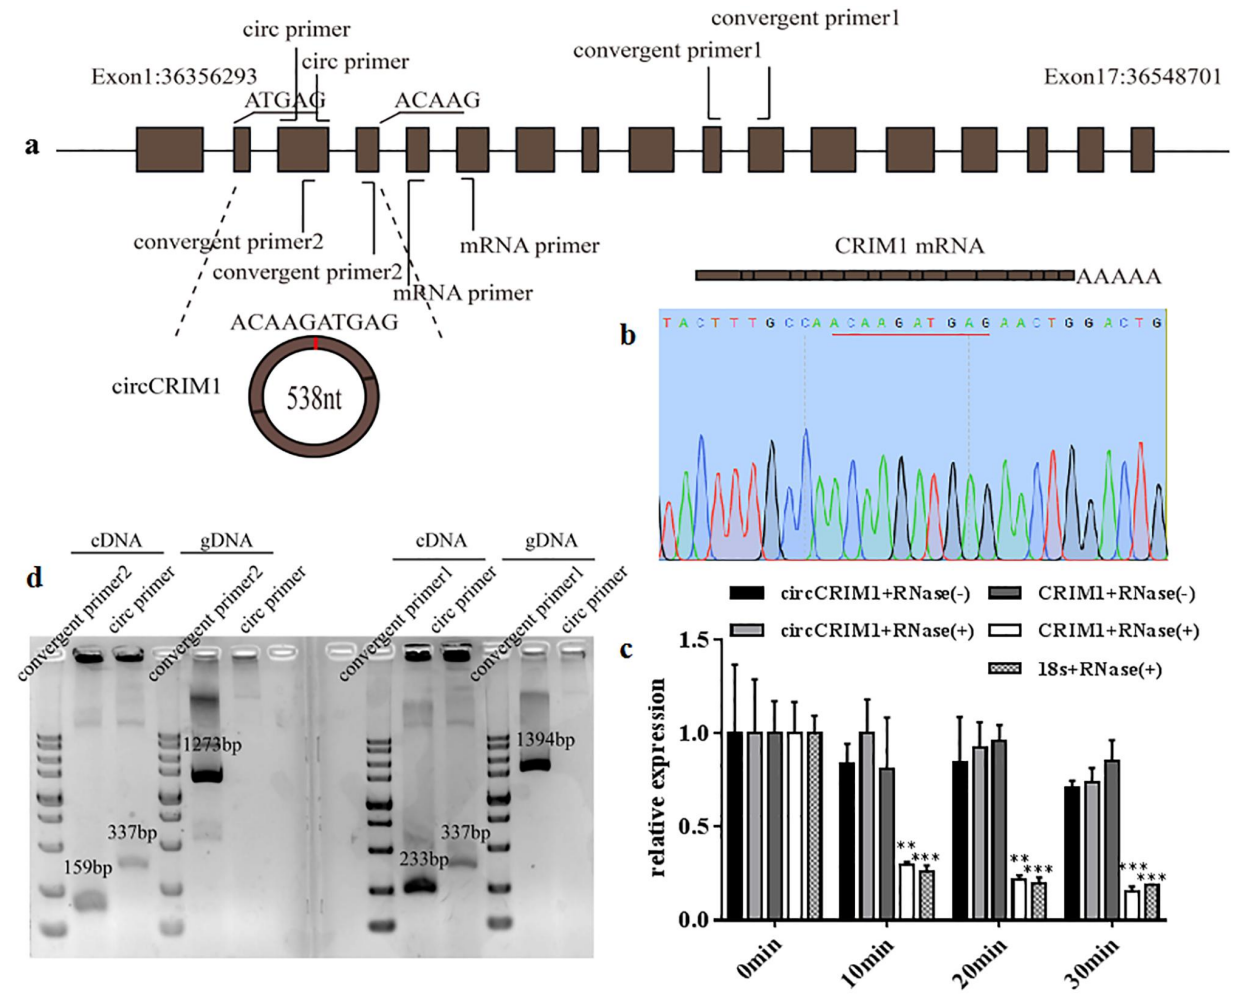

CircCRIM1 was generated from exon2-4 of CRIM1 (a). Sanger sequencing verified the back-splicing

junction of circCRIM1 (b). CircCRIM1 was more resistant to RNase R than CRIM1 and 18s (c).

CircCRIM1 was only derived from RNA but not DNA (d). Three separate experiments were conducted;

Data are shown as the mean  $\pm$  SD. \* $P < 0.05$ , \*\* $P < 0.01$ , \*\*\* $P < 0.001$  and \*\*\*\* $P < 0.0001$ .
